# Supplementary material for: Comparative Analysis of mRNA and miRNA Expression between Dermal Papilla Cells and Hair Matrix Cells of Hair Follicles in Yak
Source: MDPI journal article supplement (doi:10.3390/cells11243985), 2022-12-09
Supplement: s1 [file s1]

**Table S4.** Statistics of the counts of known miRNAs and novel miRNAs

| <b>Types</b> | <b>Total</b> | <b>DPCs_1</b> | <b>DPCs_2</b> | <b>DPCs_3</b> | <b>HMCs_1</b> | <b>HMCs_2</b> | <b>HMCs_3</b> |
|--------------|--------------|---------------|---------------|---------------|---------------|---------------|---------------|
| Known miRNAs | 757          | 622           | 619           | 618           | 608           | 609           | 623           |
| Novel miRNAs | 2096         | 1069          | 1099          | 1106          | 1142          | 1166          | 1196          |
