# Supplementary material for: Comparative Analysis of mRNA and miRNA Expression between Dermal Papilla Cells and Hair Matrix Cells of Hair Follicles in Yak
Source: MDPI journal article supplement (doi:10.3390/cells11243985), 2022-12-09
Supplement: s1 [file s1]

Table S1 Primers used in qPCR

| Name            | Accession number     | Forward primer          | Reverse primer         | Product size |
|-----------------|----------------------|-------------------------|------------------------|--------------|
| SFRP1           | ENSBGRG00000011484   | GAGATGCTCAAGTGCGACAAG   | TTTCATCCTCAGGGCAAACCTC | 180          |
| BCL2            | ENSBGRG00000019339   | GGGGTCATGTGTGTGGAGAG    | TCCACAAAGGCGTCCCAG     | 137          |
| WNT5A           | ENSBGRG00000021892   | ATTCTTGGTGGTCGCTAGGT    | ACTCCTTGATGCCCCGTCTTG  | 180          |
| PCOLCE          | ENSBGRG00000020493   | AGACCCCCAACTACACCAGA    | TCTGGCTCTTAGGGACCGTT   | 144          |
| TGFB2           | ENSBGRG00000005633   | TCTCCTGCTAATGTTGTTGCC   | AATGTAAAGTGGGCGTAGGC   | 133          |
| ITGA6           | ENSBGRG00000010970   | CAACAAAGACGGGTGGCAAG    | AGACGAATCGGCTTGACGTT   | 132          |
| LEF1            | ENSBGRG00000006944   | TGTCAACTCCAAACAAGGCAT   | ATACACAGGCTGACCTTGCC   | 127          |
| SOX9            | ENSBGRG00000026479   | CTCTGGAGACTGCTGAACGA    | GCGGCTGGTACTTGTAGTCC   | 106          |
| bta-miR-143     | MI0009743            | TGAGATGAAGCACTGTAGCTCG  |                        |              |
| bta-miR-199a-3p | MI0004758            | ACAGTAGTCTGCACATTGGTTA  |                        |              |
| bta-miR-214     | MI0005040            | ACAGCAGGCACAGACAGGCAGT  |                        |              |
| bta-miR-218     | MI0009780            | TTGTGCTTGATCTAACCATGTG  |                        |              |
| bta-miR-200a    | MI0005037            | TAACACTGTCTGGTAACGATGTT |                        |              |
| bta-miR-205     | MI0004759            | TCCTTCATTCCACCGGAGTCTG  |                        |              |
| bta-miR-31      | MI0004762            | AGGCAAGATGCTGGCATAGCT   |                        |              |
| pri-miR-143     | ENSBTAT00000042493.3 | CGGGAAGGGAGAAGTTGTT     | TTCCTCAGCGGACATTCTG    | 120          |
| pri-miR-199a    | ENSBTAT00000042310.2 | GCCCCAGTGTTCAGACTAC     | ACAAATGTCTTCCTCCTTGG   | 137          |
| pri-miR-200a    | ENSBTAT00000042377.2 | GGACAGTGCTGGATTTCTCG    | CTGTTTGCCTGCCCCTAGT    | 159          |
| pri-miR-205     | ENSBTAT00000042233.2 | GCTTCTCTTGTCCCTTCATTCC  | CACTGAGCCTTTTCCTTTTCC  | 138          |
| pri-miR-31      | ENSBTAT00000063739.2 | CTCAGGTGGAAGGGAAGATT    | CATAGCAGGTTCGCAGTTC    | 123          |
