# Supplementary material for: Comparative Analysis of mRNA and miRNA Expression between Dermal Papilla Cells and Hair Matrix Cells of Hair Follicles in Yak
Source: MDPI journal article supplement (doi:10.3390/cells11243985), 2022-12-09
Supplement: s1 [file s1]

**Table S3** Information of sRNA after quality filtering and mapped to yak genome and miRbase

| Samples | RawReads | CleanReads | Aligned_reads in reference genome | Aligned_reads in miRbase |
|---------|----------|------------|-----------------------------------|--------------------------|
| DPCs_1  | 27.29M   | 23904796   | 22977654(96.12%)                  | 17419876(72.87%)         |
| DPCs_2  | 26.92M   | 23937085   | 23053738(96.31%)                  | 17544649(73.29%)         |
| DPCs_3  | 27.55M   | 24246764   | 23354073(96.32%)                  | 17367241(71.63%)         |
| HMCs_1  | 27.52M   | 24693655   | 23672179(95.86%)                  | 18138656(73.45%)         |
| HMCs_2  | 27.51M   | 24484528   | 23422697(95.66%)                  | 17689056(72.25%)         |
| HMCs_3  | 26.69M   | 24006933   | 22984889(95.74%)                  | 17251524(71.86%)         |
