# Supplementary material for: Comparative Analysis of mRNA and miRNA Expression between Dermal Papilla Cells and Hair Matrix Cells of Hair Follicles in Yak
Source: MDPI journal article supplement (doi:10.3390/cells11243985), 2022-12-09
Supplement: s1 [file s1]

**Table S2.** Information of reads mapping to the reference genome

| Sample | Clean bases | Raw reads | Clean reads | Total mapped reads |
|--------|-------------|-----------|-------------|--------------------|
| DPCs1  | 7.08G       | 49.06M    | 48083610    | 44716378(93.00%)   |
| DPCs2  | 7.00G       | 48.80M    | 47867468    | 44473541(92.91%)   |
| DPCs3  | 7.00G       | 48.55M    | 47591316    | 44203481(92.88%)   |
| HMCs1  | 7.24G       | 50.05M    | 49097296    | 45272937(92.21%)   |
| HMCs2  | 7.37G       | 51.03M    | 50057282    | 46112250(92.12%)   |
| HMCs3  | 7.32G       | 50.67M    | 49761244    | 45798561(92.04%)   |
